# Supplementary material for: Identification and Importance of Brown Adipose Tissue in Adult Humans
Source: Atypon-hosted journal article supplement (doi:10.1056/nejmoa0810780), 2009-04-08
Supplement: nejm_cypess_1509sa1.pdf [file nejm_cypess_1509sa1.pdf]

## Supplementary Appendix

This appendix has been provided by the authors to give readers additional information about their work.

Supplement to: Cypess AM, Lehman S, Williams G, et al. Identification and importance of brown adipose tissue in adult humans. *N Engl J Med* 2009;360:1509-17.

**Supplementary Table 1. Clinical characteristics of BAT-negative and BAT-positive patients.**

| Characteristic                            | BAT negative<br>(N=204) | BAT positive<br>(N=106) |
|-------------------------------------------|-------------------------|-------------------------|
| Female – no. (%)                          | 96 (47.1)               | 76 (71.7)               |
| Age – years                               | 59.7 ± 14.8             | 49.8 ± 16.3             |
| Age – tertiles                            |                         |                         |
| <50 y – no. (%)                           | 52 (25.5)               | 51 (48.1)               |
| 50-64 y – no. (%)                         | 67 (32.8)               | 36 (34.0)               |
| >64 y – no. (%)                           | 85 (41.7)               | 19 (17.9)               |
| BMI – kg/m <sup>2</sup>                   | 26.6 ± 5.1              | 25.7 ± 5.2              |
| BMI – tertiles                            |                         |                         |
| <23.5 kg/m <sup>2</sup> – no. (%)         | 62 (30.4)               | 42 (39.6)               |
| 23.5-27.8 kg/m <sup>2</sup> – no. (%)     | 66 (32.4)               | 36 (34.0)               |
| >27.8 kg/m <sup>2</sup> – no. (%)         | 76 (37.2)               | 28 (26.4)               |
| Glucose – mg/dl                           | 104.0 ± 27              | 98.4 ± 21               |
| Glucose – tertiles                        |                         |                         |
| <93 mg/dL – no. (%)                       | 63 (30.9)               | 40 (37.7)               |
| 93-103 mg/dL – no. (%) <sup>*</sup>       | 65 (31.9)               | 39 (36.8)               |
| >103 mg/dL – no. (%)                      | 76 (37.3)               | 27 (25.5)               |
| Beta-blockers use – no. (%) <sup>†</sup>  | 47 (24.5)               | 2 (2.0)                 |
| Benzodiazepine use – no. (%) <sup>†</sup> | 19 (9.9)                | 20 (19.8)               |
| Oncologic diagnosis                       |                         |                         |
| No cancer – no. (%)                       | 14 (6.9)                | 8 (7.6)                 |
| Lymphoma – no. (%)                        | 82 (40.2)               | 49 (46.2)               |
| Other cancers – no. (%)                   | 108 (52.9)              | 49 (46.2)               |
| Smoking History <sup>‡</sup>              |                         |                         |
| Never – no. (%)                           | 85 (46.7)               | 64 (64.0)               |
| Former – no. (%)                          | 72 (39.6)               | 25 (25.0)               |
| Current – no. (%)                         | 25 (13.7)               | 11 (11.0)               |

\*Includes 1 BAT-positive and 3 BAT-negative subjects who had missing glucose values.

<sup>†</sup>Data on beta-blocker and benzodiazepine use were missing for 5 BAT-positive and 12 BAT-negative patients.

<sup>‡</sup>Data on smoking history were missing for 6 BAT-positive and 22 BAT-negative subjects.

## Supplementary Figure 1

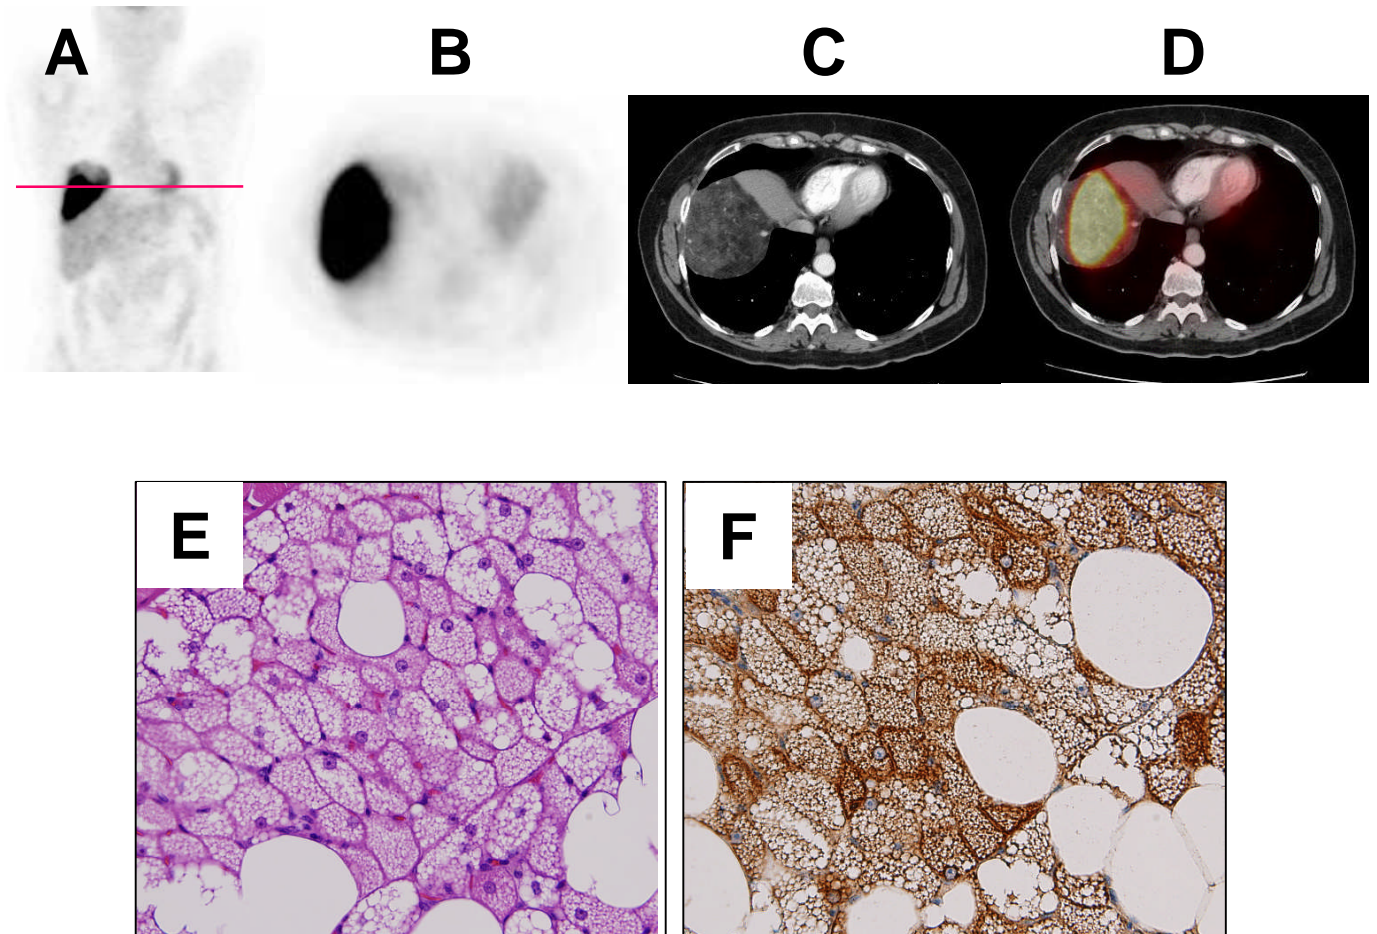

**Supplementary Figure 1. Immunohistochemistry demonstrating that  $^{18}\text{F}$ -FDG avid adipose tissue is BAT.** Panels A-F are from a 67 year-old woman with a hibernoma. Panel A shows the attenuation-corrected coronal PET image. Panels B, C, and D, show, respectively, the axial attenuation-corrected PET image, axial CT image, and fused PET/CT. The FDG-avid mass was resected and studied histologically with Panel E showing hematoxylin and eosin staining and Panel F showing antibody (1:50) to UCP-1, the defining protein of BAT, counterstained with hematoxylin. Both Panels E and F are at 400X magnification.

## Supplementary Figure 2

**A**

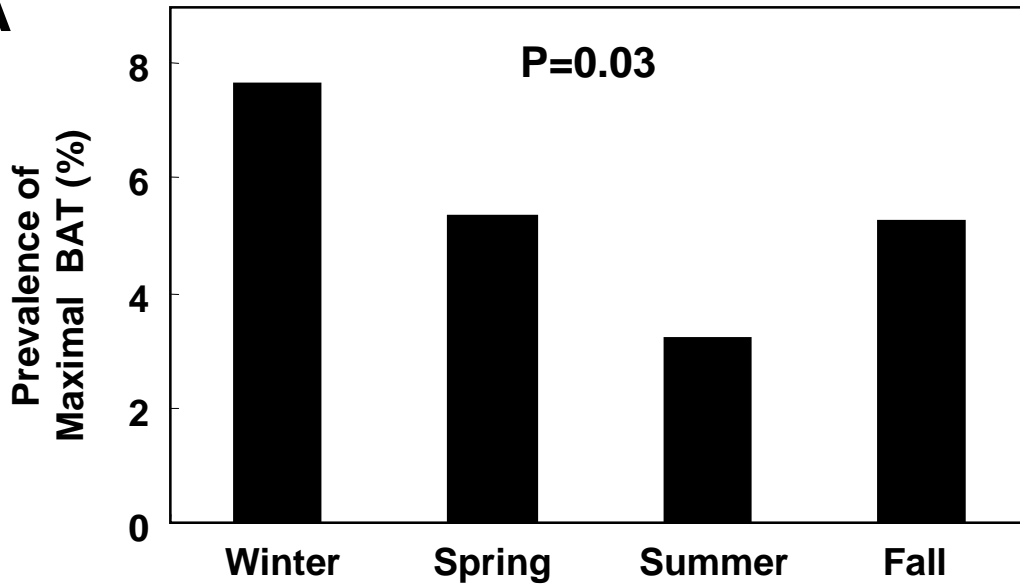

**B**

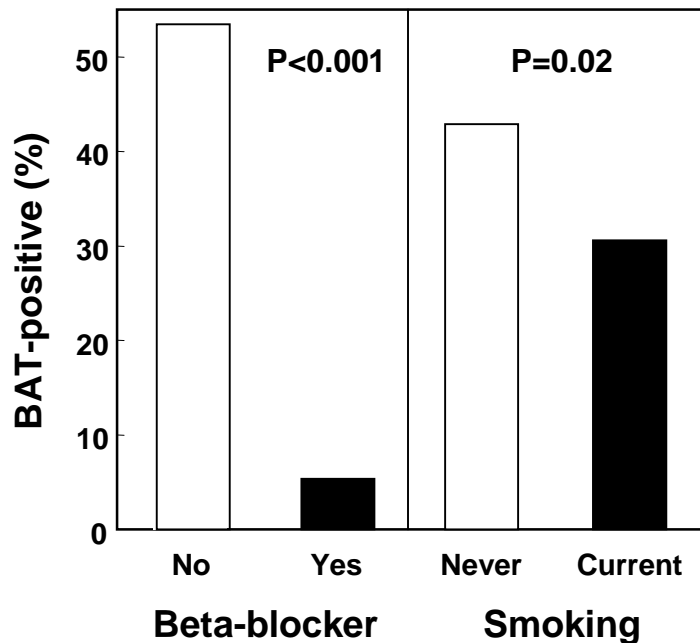

**Supplementary Figure 2. Temperature dependence of maximal BAT and relationship between BAT expression and pharmacologic predictors.** In Panel A the dates upon which the BAT-positive patients had maximal BAT activity were determined and the prevalence of maximal BAT per season when compared with the entire population of 1,972 scanned patients using the chi-square goodness of fit test. Panel B shows the percentage of BAT-positive patients in the absence (empty) or presence (filled) of either daily beta-blocker use (left panel) or smoking history (right panel). Univariate analysis was used to assess the significance of the different percentages by chi-square test with P values shown for each predictor.

## Supplementary Figure 3

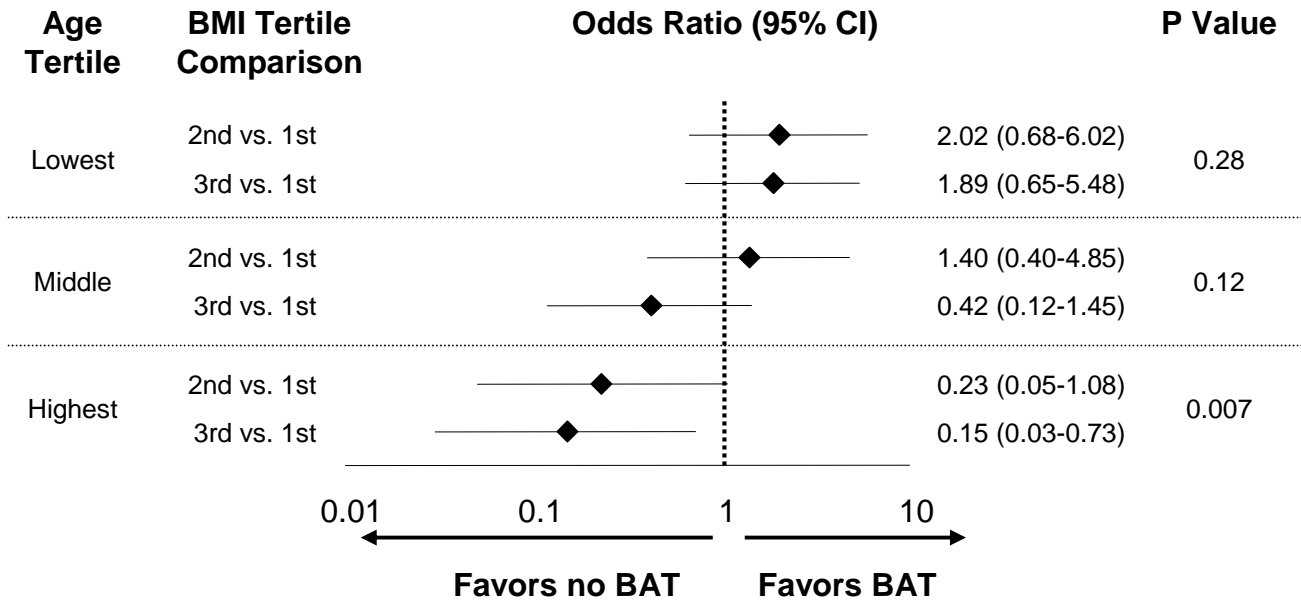

**Supplementary Figure 3. Odds Ratios for the Interaction Between Age and BMI.** The nested case-control series of 310 patients was modeled using an additional interaction term between age and BMI, adjusted for sex, age, glucose, type of cancer, smoking, and benzodiazepine and beta-blockers use. The age tertiles were younger than 50 y (lowest), 50 to 64 y (middle), and older than 64 y (highest). The BMI tertiles were less than 23.5 kg/m<sup>2</sup> (lowest), 23.5 to 27.8 kg/m<sup>2</sup> (middle), and greater than 27.8 kg/m<sup>2</sup> (highest). Shown are the odds ratios and 95% CI for each comparison and the P values for each age tertile when calculated by chi-square test for linear trend. The P value for the overall interaction between age and BMI was 0.008.
